# Supplementary material
Source: PubMed Central journal article supplement (PMC5892450)
Supplement: NIHMS954203-supplement-Supplemental.pdf [file NIHMS954203-supplement-Supplemental.pdf]

**FIGURE 1. CONSORT Diagram**

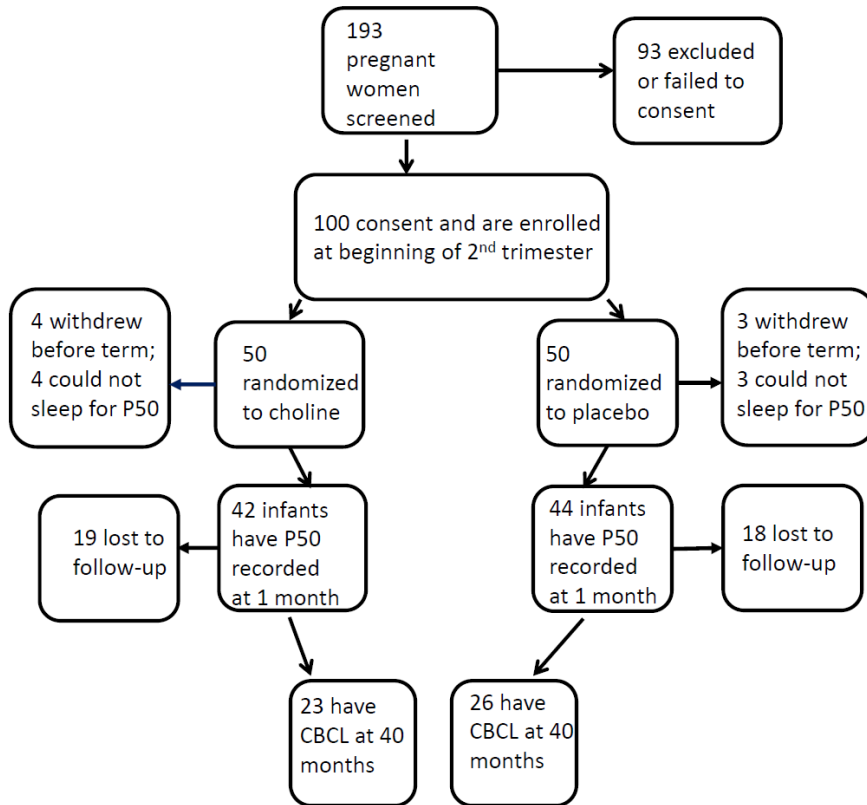

**TABLE S1. Models of Interaction Between Perinatal Phosphatidylcholine Treatment and CHRNA7 rs3087454 on Child Behavior Check List Ratings at 40 months.**

1. Models for CBCL Withdrawn: SAS Procedure GLM

Dependent Variable: CBCL Withdrawn Rank Score

| Source  | DF   | Type III SS | Mean Square | F Value | Pr > F |
|---------|------|-------------|-------------|---------|--------|
| Gender  | 1,46 | 975.921339  | 975.921339  | 7.60    | 0.0083 |
| Choline | 1,46 | 1234.374985 | 1234.374985 | 9.61    | 0.0033 |

Moderation Model: Dependent Variable CBCL Withdrawn Rank Score

| Source         | DF   | Type III SS | Mean Square | F Value | Pr > F |
|----------------|------|-------------|-------------|---------|--------|
| Gender         | 1,39 | 399.5676506 | 399.5676506 | 3.43    | 0.0715 |
| Choline        | 1,39 | 5.9937950   | 5.9937950   | 0.05    | 0.8216 |
| CHRNA7         | 1,39 | 234.6636709 | 234.6636709 | 2.02    | 0.1635 |
| Choline*CHRNA7 | 1,39 | 513.2647770 | 513.2647770 | 4.41    | 0.0422 |

2. Models for CBCL Attention: SAS Procedure GLM

| Source  | DF   | Type III SS | Mean Square | F Value | Pr > F |
|---------|------|-------------|-------------|---------|--------|
| Gender  | 1,46 | 410.3458139 | 410.3458139 | 2.27    | 0.1384 |
| Choline | 1,46 | 822.0734414 | 822.0734414 | 4.56    | 0.0382 |

Moderation Model: Dependent Variable CBCL Attention Rank Score

| Source         | DF   | Type III SS | Mean Square | F Value | Pr > F |
|----------------|------|-------------|-------------|---------|--------|
| Gender         | 1,39 | 363.6971510 | 363.6971510 | 2.16    | 0.1498 |
| Choline        | 1,39 | 0.6306959   | 0.6306959   | 0.00    | 0.9515 |
| CHRNA7         | 1,39 | 1.3757017   | 1.3757017   | 0.01    | 0.9285 |
| Choline*CHRNA7 | 1,39 | 220.8521252 | 220.8521252 | 1.31    | 0.2593 |
